# Supplementary material for: The Burden of Impaired Serum Albumin Antioxidant Properties and Glyco-Oxidation in Coronary Heart Disease Patients with and without Type 2 Diabetes Mellitus
Source: MDPI journal article supplement (doi:10.3390/antiox11081501), 2022-07-30
Supplement: s1 [file s1]

**Supplementary Table S1.** Clinical and metabolic data evaluated in the four groups of subjects.

| Parameter                 | A - Diabetics with CHD<br>(n=33) | B – Diabetics without CHD<br>(n=31) | C - Non-diabetics with CHD<br>(n=30) | D – Controls<br>(n=27) |
|---------------------------|----------------------------------|-------------------------------------|--------------------------------------|------------------------|
| Age (y)                   | 65.5±8.3 <sup>a</sup>            | 60.0±5.9 <sup>a</sup>               | 65.6±6.0 <sup>a</sup>                | 47.3±13.4 <sup>b</sup> |
| BMI (kg/m <sup>2</sup> )  | 29.8±3.9 <sup>a</sup>            | 29.2±3.4 <sup>ab</sup>              | 26.8±5.1 <sup>bc</sup>               | 25.5±3.3 <sup>c</sup>  |
| FPG (mg/dl)               | 142±41 <sup>a</sup>              | 144±36 <sup>a</sup>                 | 91±11 <sup>b</sup>                   | 89±14 <sup>b</sup>     |
| HbA1c (%)                 | 7.0±0.8 <sup>a</sup>             | 6.9 ±0.8 <sup>a</sup>               | 5.8±0.2 <sup>b</sup>                 | 5.5±0.4 <sup>b</sup>   |
| Total cholesterol (mg/dl) | 151±35 <sup>b</sup>              | 191±35 <sup>a</sup>                 | 155±40 <sup>b</sup>                  | 194±19 <sup>a</sup>    |
| LDL cholesterol (mg/dl)   | 82±30 <sup>b</sup>               | 112±39 <sup>a</sup>                 | 86±31 <sup>b</sup>                   | 116±18 <sup>a</sup>    |
| HDL cholesterol (mg/dl)   | 42±9 <sup>b</sup>                | 49±10 <sup>ab</sup>                 | 53±16 <sup>a</sup>                   | 56±13 <sup>a</sup>     |
| Triglycerides (mg/dl)     | 161±80 <sup>a</sup>              | 138±72 <sup>a</sup>                 | 91±40 <sup>b</sup>                   | 93±28 <sup>b</sup>     |

BMI, body mass index; CHD, coronary heart disease; FPG, fasting plasma glucose; GLY-HSA, glycated albumin; HbA1c, glycated hemoglobin; HDL, high density lipoprotein; LDL, low density lipoprotein. Data are expressed as mean ±SD. For each variable, means of groups not sharing any superscript letter are significantly different by the Tukey's HSD test at the 5% level of significance.

**Supplementary Table S2.** Significant correlations between the metabolic and glyco-oxidation parameters evaluated considering all the patients (groups A, B and C; n=94).

| Parameter correlation        | Pearson's <i>r</i> | <i>p</i> |
|------------------------------|--------------------|----------|
| AGE vs FPG                   | 0.2955             | 0.0042   |
| AGE vs HbA1c                 | 0.2781             | 0.0073   |
| AGE vs Pentosidine           | 0.2427             | 0.0198   |
| AGE vs RAGE                  | 0.3795             | 0.0002   |
| RAGE vs sRAGE                | 0.5928             | <0.0001  |
| GLY-HSA vs FPG               | 0.3738             | 0.0002   |
| GLY-HSA vs HbA1c             | 0.4903             | <0.0001  |
| GLY-HSA vs THIO-HSA          | -0.3505            | 0.0005   |
| THIO-HSA vs FPG              | -0.3685            | 0.0003   |
| THIO-HSA vs HbA1c            | -0.3753            | 0.0002   |
| THIO-HSA vs AGE <sup>†</sup> | 0.3805             | 0.0289   |

AGE, advanced glycation end products; FPG, fasting plasma glucose; GLY-HSA, glycated albumin; HbA1c, glycated hemoglobin; RAGE, receptor for advanced glycation end-products; sRAGE, soluble RAGE; THIO-HSA, thiolated albumin. <sup>†</sup>The correlation THIO-HSA vs AGE is referred to Group A (Diabetics with CHD) only; no significant correlation was found for groups B and C.
